# Supplementary material for: LncRNA UCA1 mediates Cetuximab resistance in Colorectal Cancer via the MiR-495 and HGF/c-MET Pathways
Source: PubMed Central journal article supplement (PMC8692674; doi:10.7150/jca.65687), 2022-01-01
Supplement: jcav13p0253s1.pdf [file jcav13p0253s1.pdf]

**Supplementary Table 1.** Detailed information on the primer sequences

| <b>Primers for real time PCR</b>                            |                                                   |
|-------------------------------------------------------------|---------------------------------------------------|
| UCA1-F                                                      | AAGAGATCCACCTGCGACCT                              |
| UCA1-R                                                      | CCTCCACCGTAAGAGTTACC                              |
| GAPDH-F                                                     | CATGGCCTTCCGTGTTCCCTA                             |
| GAPDH-R                                                     | TGTCATCATACTTGGCAGGTTT                            |
| U6-F                                                        | TGCTCGCTTCGGCAGCACAT                              |
| U6-R                                                        | CTTGCGCAGGGGCCATGCTA                              |
| MT RNR1-F                                                   | CCTCCCCAATAAAGCTAAAA                              |
| MT RNR1-R                                                   | GCTATTGTGTGTTTCAGATAT                             |
| $\beta$ -actin-F                                            | AGTGTGACGTGGACATCCGCAAAG                          |
| $\beta$ -actin-R                                            | ATCCACATCTGCTGGAAGGTGGAC                          |
| HGF-F                                                       | TAGGCACTGACTCCGAACA                               |
| HGF-R                                                       | AGGAGATGCAGGAGGACAT                               |
| c-MET-F                                                     | AGTGAGAAGGCTAAAGGAAACG                            |
| c-MET-R                                                     | TTTGGACCGTCAAGAAGTAAAT                            |
| <b>Primers for UCA1 cloning</b>                             |                                                   |
| UCA1-pLVX-F                                                 | CGGAATTCTGACATTCTTCTGGACAATGAGT                   |
| UCA1-pLVX-R                                                 | CGGGATCCCTGACTCTTTTAGGAAGATTCT                    |
| <b>Primers for construction luciferase reporter vectors</b> |                                                   |
| UCA1-pmirGLO-F                                              | GCTCTAGATGACATTCTTCTGGACAATGAGT                   |
| UCA1-pmirGLO-R                                              | TTTTCCTTTTGCGGCCCGCTGACTCTTTTAGGAAGATTCT          |
| HGF-pmirGLO-F                                               | GCTCTAGAACCTGAATGCCATGTGGGCCAT                    |
| HGF-pmirGLO-R                                               | TTTTCCTTTTGCGGCCCGCTGATCATAGAAAAGTTTATTATTTTAAAAG |
| c-MET-pmirGLO-F                                             | GCTCTAGATGCTAGTACTATGTCAAAGCAAC                   |
| c-MET-pmirGLO-R                                             | TTTTCCTTTTGCGGCCCGCTTGCATCACTTTACTTTAATTGCAT      |

|                   |                                               |
|-------------------|-----------------------------------------------|
| UCA1-pmirGLO-M-F  | GTacaacaaGTTAGAGGGCTTGGGACATTTCACT            |
| UCA1-pmirGLO-M-R  | GCCCTCTAACttgtttgACATACTTTGTGTTGTCCTGGATGC    |
| HGF-pmirGLO-M-F   | CCTcaaacaaATTAACCAAATATTTTTAAAAATATTTTCCTC    |
| HGF-pmirGLO-M-R   | GGTTAATttgtttgAGGTAAGATATCTTAGTATAAACTTGGACAG |
| c-MET-pmirGLO-M-F | CCTTTTAAatacaacaaTGTTTTTTGAGACAGGATCTCACTCT   |
| c-MET-pmirGLO-M-R | ttgtttgtaTTAAAAGGGAATGTTTACCTAATGGG           |

---

**Primers used for Sanger sequencing of KRAS, NRAS and BRAF**

---

|                                        |                           |
|----------------------------------------|---------------------------|
| KRAS-exon2-F (Codon G12, G13)          | TCAAAGAATGGTCCTGCACC      |
| KRAS-exon2-R (Codon G12, G13)          | AGGCCTGCTGAAAATGACTG      |
| KRAS-exon3-F (Codon Q61)               | ATTATTTATGGCAAATACACAAAG  |
| KRAS-exon3-R (Codon Q61)               | TCTCCCTTCTCAGGATTC        |
| KRAS-exon4-F (Codon A146)              | GAGAGAAAACTGATATATTAATGAC |
| KRAS-exon4-R (Codon A146)              | TTCTAGAACAGTAGACACAAAAC   |
| KRAS-exon4-F (Codon K117)              | CTGAGCCTGTTTTGTGTCTACTG   |
| KRAS-exon4-R (Codon K117)              | TTTTATGACAAAAGTTGTGGACAGG |
| NRAS-exon2-F (Codon G12, G13)          | CCTCTATGGTGGGATCATATTC    |
| NRAS-exon2-R (Codon G12, G13)          | CTGATTACTGGTTTCCAACAG     |
| NRAS-exon3-F (Codon Q61)               | CCTTCGCCTGTCCTCATGTA      |
| NRAS-exon3-R (Codon Q61)               | TTGAACTTCCCTCCCTCCCT      |
| NRAS-exon4-F (Codon A146)              | AATATGAATATGGATCACATCTCTA |
| NRAS-exon4-R (Codon A146)              | ATGGTGCTAGTGGGAAACAAGTGTG |
| NRAS-exon4-F (Codon K117)              | TAACTCTTGGCCAGTTCGTGG     |
| NRAS-exon4-R (Codon K117)              | AGGGAGCAGATTAAGCGAGTA     |
| BRAF-exon11-F (Codon G465, G468, Y472) | AAAAGTTGTAAACATATCCTATT   |
| BRAF-exon11-R (Codon G465, G468, Y472) | GGGACTCGAGTGATGA          |
| BRAF-exon15-F                          | GTA ACTCAGCAGCATCTCAGG    |

BRAF-exon15-R

GCTTGCTCTGATAGGAAAATGAG

---

**Supplementary Table 2.** Clinic-pathological characteristics of metastatic CRC patients with paired specimen pre- and post-cetuximab treatment

| No. | Gender | Age | Primary site     | Metastatic sites               | Differentiation <sup>1</sup> | Cetuximab regimen <sup>2</sup> | Best response to cetuximab <sup>3</sup> | Site of specimen (pre)   | Site of specimen (post) |
|-----|--------|-----|------------------|--------------------------------|------------------------------|--------------------------------|-----------------------------------------|--------------------------|-------------------------|
| 1   | M      | 55  | rectosigmoid     | liver                          | G2                           | FOLFOX4+cetuximab              | PR                                      | rectum                   | rectum                  |
| 2   | F      | 36  | left colon       | liver, lung, peritonealcavity  | G1-G2                        | FOLFOX4+cetuximab              | PR                                      | sigmoid                  | liver lesion            |
| 3   | M      | 67  | left colon       | liver, lung                    | G2                           | FOLFOX4+cetuximab              | PR                                      | sigmoid                  | sigmoid                 |
| 4   | M      | 59  | left colon       | left ovary and adnexa, lung    | G1                           | FOLFIRI+cetuximab              | SD                                      | sigmoid                  | left adnexal mass       |
| 5   | M      | 73  | rectum           | liver                          | G2                           | FOLFOX4+cetuximab              | PR                                      | rectum                   | liver lesion            |
| 6   | M      | 80  | transverse colon | liver, bone                    | G3                           | Cetuximab                      | SD                                      | transverse colon         | transverse colon        |
| 7   | F      | 52  | left colon       | liver                          | G2-G3                        | FOLFIRI+cetuximab              | SD                                      | left colon               | liver lesion            |
| 8   | F      | 45  | left colon       | liver                          | G1                           | FOLFOX4+cetuximab              | PR                                      | sigmoid                  | liver lesion            |
| 9   | M      | 42  | right colon      | liver, lung, peritoneal cavity | G2                           | FOLFIRI+cetuximab              | SD                                      | hepatic flexure of colon | abdominal wall mass     |
| 10  | F      | 58  | left colon       | liver, lung, peritoneal cavity | G2                           | mFOLFOX6+cetuximab             | SD                                      | sigmoid                  | omental mass            |

1. G1, well-differentiated, G2, moderately differentiated, G3, poorly differentiated.

2. Cetuximab 400 mg/m<sup>2</sup> initial dose followed by 250 mg/m<sup>2</sup> weekly thereafter with cetuximab dose intensity >90% were given to all subjects.

Chemotherapy regimens: FOLFOX4 or mFOLFOX6, modified FOLFOX6 (5-fluorouracil, leucovorin, and oxaliplatin).

3. PR, partial response; SD, stable disease.

**Supplementary Table 3.** The antibodies used in the present study

| <b>Name</b>                                              | <b>Company</b> | <b>Code</b> |
|----------------------------------------------------------|----------------|-------------|
| p-MET                                                    | Santa Cruz     | sc-101736   |
| MET                                                      | Santa Cruz     | sc-514148   |
| p-p85                                                    | CST            | 4228        |
| p85                                                      | CST            | 4292        |
| p-AKT (Ser <sup>473</sup> )                              | CST            | 4060        |
| AKT                                                      | CST            | 4691        |
| p-p44/42 MAPK (Thr <sup>202</sup> , Tyr <sup>204</sup> ) | CST            | 4370        |
| p44/42 MAPK                                              | CST            | 4695        |
| $\beta$ -actin                                           | Santa Cruz     | sc-47778    |
| TR Monoclonal Antibody                                   | Proteintech    | 67728-1-Ig  |
| Goat Anti-Rabbit IgG-FITC                                | Proteintech    | SA00003-2   |
